# Supplementary material
Source: ML conference proceedings conference paper supplement (https://openaccess.thecvf.com/content/ICCV2023/html/Rana_DynaMITe_Dynamic_Query_ICCV_2023_paper.html)
Supplement: Supplementary file 2 [file Rana_DynaMITe_Dynamic_Query_ICCV_2023_supplemental.zip]

# DynaMITe: Supplementary Material

## Abstract

*In this supplementary material, we provide some additional details, ablations and also qualitative results for our approach.*

## I. Additional Implementation Details

As explained in Sec. 3, DynaMITe takes an image as input, and generates a set of output masks probabilities  $Y^t = \{Y_1^t, Y_2^t, \dots, Y_n^t\}$  by multiplying the instance encoder’s output  $Q_{out}^t$  with the output feature map  $F_{out}^M$  at timestep  $t$ . Here, each  $Y_i$  represents a set of object probabilities for  $o_i \in \{\mathcal{O}, bg\}$ , where  $bg$  represents the background. The final segmentation masks  $\mathcal{M}^t$  are then obtained by first taking a max per pixel over each  $Y_i$ , and then an argmax over the entire  $Y^t$ .

**Training.** During training, we apply a weighted sum of the binary cross-entropy loss and the dice loss  $L = \lambda_1 L_{bce} + \lambda_2 L_{dice}$  [4] on the individual mask probabilities. The network is trained end-to-end using the AdamW [2] optimizer for 50 epochs with a batch size of 32 and an initial learning rate of  $1e-4$ , which is then decayed by 0.1 after 44 and 48 epochs respectively. The models used for ablation are trained with batch size 128 and an initial learning rate of  $5e-4$ .

## II. MIST: Additional Evaluation Strategies

In Sec. 4 we discussed a number of click simulation strategies that could potentially capture some of the user patterns for the MIST. Since these simulation strategies are not exhaustive, we discuss a few more such next-click strategies that could be used to better emulate how a user might perform a MIST. We also evaluate DynaMITe on all of these strategies in Tab. I, and once again confirm that our model is robust against different user patterns.

**Round-robin:** The round-robin strategy assigns a click window of  $\beta$  clicks for each of the objects in an image. Here, an object is chosen randomly and after the current object of focus exhausts all the  $\beta$  clicks, the next random object is chosen and then refined until completion. Once all the objects in the input image are processed in this man-

ner, the round-robin strategy revisits all the failed objects and then tries to refine their segmentation masks either until all the objects are fully segmented, or until the image-level click budget  $\tau * |\mathcal{O}|$  is fully used up.

**Worst with limit:** Here, in each iteration we choose the object with the worst IoU, as we also do in the *worst* strategy described in Sec. 4, but we additionally add a per-object click limit  $\beta$  to each object. Upon selecting the next worst object, we first check if this object has not reached its click limit and if it did, we skip this object until all objects have either been segmented or reached their limit. After this is the case, we switch to the *best* strategy and try to segment the remaining objects as usual until the image budget is used up or all objects are segmented. The intuition behind this strategy is that a user will try to improve the biggest errors first, but they will notice when an object is not segmentable by the method at hand and rather spend more clicks on objects which can be segmented properly.

**Max-distance:** In this strategy, we again start by adding a positive click to each of the foreground objects. During refinement, the next click is simply sampled on the pixel with the maximum distance from the distance transform computed on the error region of the entire semantic map that includes the segmentation masks for all objects in an image. If the chosen pixel falls on an object, then a corresponding positive click is added to that object, and if it doesn’t, then it is classified as a negative click.

For the results reported in Tab. I, we use  $\tau = 10$  and  $\beta = 10$ . All of the strategies work and *worst with limit* actually results in a lower number of failed objects in all cases, while having comparable NCI. The *max-distance* strategy is actually amongst the worst, resulting in the highest number of failed images. A potential reason could be that due to the joint maximum distance transform over all object errors, the clicks are no longer sampled in order to specifically correct a mistake with respect to one object and are thus less targeted. This in turn might lead to failed objects, where the other strategies that rely on a per-object distance transform actually are able to sample clicks in more useful locations.

## III. Extended Ablations

Here, we extend the ablation experiments performed in Sec. 5.2 to additional datasets. Tab. II and Tab. III re-

| Backbone | Strategy         | COCO        |              |             |             | SBD         |            |            |             | DAVIS17     |            |            |             |
|----------|------------------|-------------|--------------|-------------|-------------|-------------|------------|------------|-------------|-------------|------------|------------|-------------|
|          |                  | NCI ↓       | NFO ↓        | NFI ↓       | IoU ↑       | NCI ↓       | NFO ↓      | NFI ↓      | IoU ↑       | NCI ↓       | NFO ↓      | NFI ↓      | IoU ↑       |
| Resnet50 | best             | 6.20        | 15690        | 2508        | 80.9        | 2.87        | 677        | 352        | 90.0        | 3.42        | 572        | 380        | 86.9        |
| Resnet50 | random           | 6.13        | 13554        | 2461        | 84.4        | 2.81        | 559        | 329        | 90.4        | 3.39        | 580        | 375        | 87.3        |
| Resnet50 | worst            | 6.09        | 20224        | 2447        | 82.6        | 2.78        | 870        | 324        | 90.2        | 3.36        | 773        | 375        | 86.2        |
| Resnet50 | max-distance     | 6.82        | 14786        | 2890        | 85.2        | 3.24        | 762        | 471        | 90.7        | 3.57        | 627        | 405        | 87.5        |
| Resnet50 | round-robin      | 6.51        | 15534        | 2501        | 83.4        | 3.50        | 620        | 335        | 90.3        | 4.07        | 609        | 373        | 87.1        |
| Resnet50 | worst with limit | 6.09        | 13249        | 2444        | 84.1        | 2.79        | 541        | 326        | 90.4        | 3.36        | 570        | 375        | 87.2        |
| Resnet50 | mean             | 6.31        | 15506        | 2542        | 83.4        | 3.00        | 671        | 356        | 90.3        | 3.53        | 622        | 380        | 87.0        |
| Resnet50 | std              | 0.30        | 2519         | 173         | 1.5         | 0.30        | 126        | 57         | 0.23        | 0.28        | 77         | 12         | 0.45        |
| Segf-B0  | best             | 6.13        | 15219        | 2485        | 81.3        | 2.83        | 655        | 342        | 90.2        | 3.29        | 546        | 364        | 87.5        |
| Segf-B0  | random           | 6.04        | 12986        | 2431        | 84.9        | 2.76        | 528        | 313        | 90.6        | 3.27        | 549        | 356        | 87.9        |
| Segf-B0  | worst            | 6.02        | 19758        | 2414        | 83.0        | 2.75        | 841        | 315        | 90.3        | 3.25        | 707        | 354        | 87.1        |
| Segf-B0  | max-distance     | 6.79        | 14588        | 2885        | 85.5        | 3.18        | 735        | 441        | 90.8        | 3.42        | 592        | 388        | 88.2        |
| Segf-B0  | round-robin      | 6.42        | 14608        | 2452        | 84.0        | 3.47        | 609        | 339        | 90.5        | 3.95        | 573        | 362        | 87.8        |
| Segf-B0  | worst with limit | 6.03        | 12745        | 2425        | 84.6        | 2.75        | 519        | 320        | 90.5        | 3.25        | 526        | 354        | 87.9        |
| Segf-B0  | mean             | 6.24        | 14984        | 2515        | 83.8        | 2.96        | 648        | 345        | 90.5        | 3.40        | 582        | 363        | 87.7        |
| Segf-B0  | std              | 0.31        | 2536         | 183         | 1.5         | 0.30        | 124        | 48         | 0.21        | 0.27        | 65         | 13         | 0.38        |
| hrnet32  | best             | 6.14        | 15092        | 2506        | 81.5        | 2.81        | 640        | 347        | 90.2        | 3.23        | 539        | 353        | 87.3        |
| hrnet32  | random           | 6.02        | 12547        | 2417        | 85.1        | 2.74        | 515        | 316        | 90.6        | 3.20        | 541        | 347        | 87.7        |
| hrnet32  | worst            | 5.99        | 19419        | 2410        | 83.3        | 2.72        | 819        | 314        | 90.4        | 3.18        | 700        | 345        | 86.9        |
| hrnet32  | max-distance     | 6.76        | 14252        | 2850        | 85.6        | 3.16        | 721        | 441        | 90.8        | 3.35        | 583        | 375        | 87.9        |
| hrnet32  | round-robin      | 6.42        | 14279        | 2467        | 84.2        | 3.45        | 612        | 340        | 90.4        | 3.88        | 566        | 349        | 87.5        |
| hrnet32  | worst with limit | 6.000       | 12191        | 2414        | 84.7        | 2.72        | 496        | 311        | 90.5        | 3.18        | 528        | 347        | 87.6        |
| hrnet32  | mean             | 6.22        | 14630        | 2511        | 84.1        | 2.93        | 634        | 345        | 90.5        | 3.34        | 576        | 353        | 87.5        |
| hrnet32  | std              | 0.31        | 2596         | 170         | 1.5         | 0.31        | 123        | 49         | 0.20        | 0.27        | 64         | 11         | 0.35        |
| Swin-T   | best             | 6.07        | 14853        | 2460        | 81.8        | 2.75        | 624        | 327        | 90.3        | 3.20        | 501        | 348        | 87.7        |
| Swin-T   | random           | 6.00        | 12710        | 2401        | 85.1        | 2.69        | 510        | 303        | 90.7        | 3.16        | 514        | 338        | 88.0        |
| Swin-T   | worst            | 5.94        | 19309        | 2369        | 83.4        | 2.68        | 798        | 300        | 90.5        | 3.16        | 704        | 341        | 87.1        |
| Swin-T   | max-distance     | 6.74        | 14277        | 2854        | 85.7        | 3.15        | 737        | 449        | 90.9        | 3.33        | 550        | 370        | 88.2        |
| Swin-T   | round-robin      | 6.37        | 14268        | 2438        | 84.3        | 3.40        | 595        | 325        | 90.6        | 3.84        | 534        | 339        | 87.9        |
| Swin-T   | worst with limit | 5.9         | 12436        | 2390        | 84.8        | 2.68        | 492        | 302        | 90.7        | 3.16        | 503        | 340        | 88.0        |
| Swin-T   | mean             | 6.18        | 14642        | 2485        | 84.2        | 2.89        | 626        | 334        | 90.6        | 3.31        | 551        | 346        | 87.8        |
| Swin-T   | std              | 0.32        | 2478         | 184         | 1.4         | 0.31        | 122        | 57         | 0.20        | 0.27        | 77         | 12         | 0.39        |
| Swin-L   | best             | 5.80        | 13876        | 2305        | 82.4        | 2.47        | 497        | 266        | 90.7        | 3.06        | 483        | 330        | 88.4        |
| Swin-L   | random           | 5.70        | 11958        | <b>2242</b> | 85.3        | 2.42        | 428        | <b>249</b> | 91.0        | 3.03        | 479        | 320        | 88.8        |
| Swin-L   | worst            | 5.66        | 18133        | 2242        | 83.7        | 2.41        | 671        | 251        | 90.8        | 2.99        | 620        | 314        | 88.1        |
| Swin-L   | max-distance     | 6.53        | 13107        | 2725        | <b>86.4</b> | 2.87        | 594        | 371        | <b>91.2</b> | 3.11        | 498        | 340        | <b>88.9</b> |
| Swin-L   | round-robin      | 6.11        | 13639        | 2305        | 84.5        | 3.12        | 490        | 261        | 90.9        | 3.70        | 504        | 320        | 88.6        |
| Swin-L   | worst with limit | <b>5.67</b> | <b>11565</b> | 2245        | 85.0        | <b>2.41</b> | <b>422</b> | 250        | 90.9        | <b>2.99</b> | <b>461</b> | <b>315</b> | 88.7        |
| Swin-L   | mean             | 5.91        | 13713        | 2344        | 84.5        | 2.62        | 517        | 275        | 90.9        | 3.15        | 507        | 323        | 88.6        |
| Swin-L   | std              | 0.35        | 2351         | 189         | 1.4         | 0.30        | 98         | 48         | 0.17        | 0.27        | 57         | 10         | 0.29        |

Table I: Results on MIST using an IoU threshold of 85%. NCI: normalised clicks per image, NFO: number of failed objects, NFI: number of failed images. All reported models are trained on COCO+LVIS.

port the results of the ablation experiments on additional multi-instance and single-instance datasets respectively. As it can be seen from these experiments, our final model with spaio-temporal positional encoding consistently outperforms other variants, and is robust towards different task settings. Although, as stated in Sec. 5.2, the impact of the spatial embedding seems to be less significant compared to the temporal counterpart in Tab II, they are still important for reducing the overall number of clicks especially in the

single-instance setting (ref Tab. III).

#### IV. Runtime and Memory Analysis

As discussed in Sec. 3, DynaMITe translates each click into a query to our interactive transformer module. Hence, the number of queries processed by the transformer increases over time during the iterative refinement process. In Figure 1, we analyze the impact of such a growing query

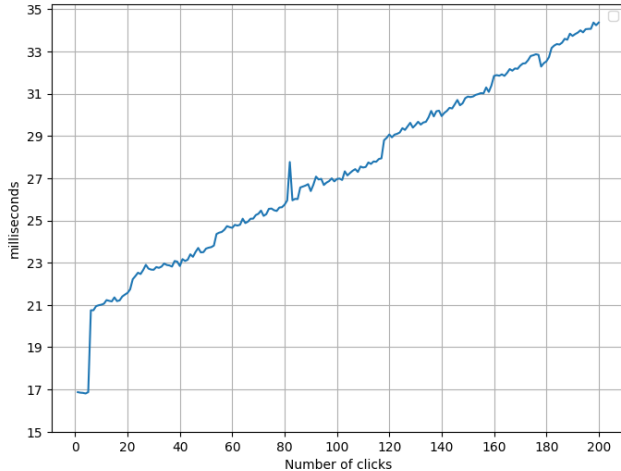

(a) Runtime Analysis

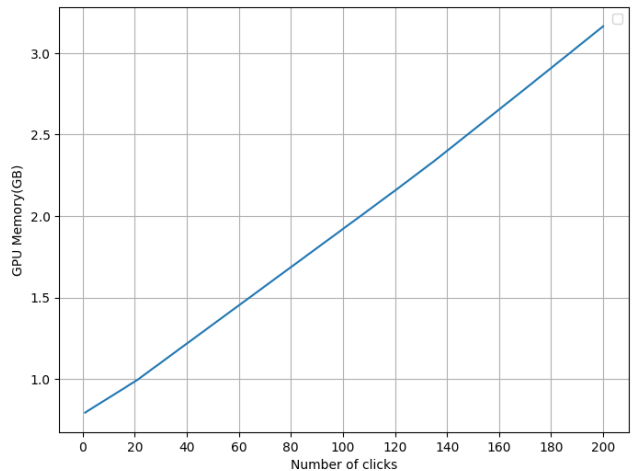

(b) Memory Analysis

Figure 1: Runtime and memory scaling with respect to the number of clicks for the interactive transformer.

|                                       | COCO        |              |             | SBD         |            |            | DAVIS17     |            |            |
|---------------------------------------|-------------|--------------|-------------|-------------|------------|------------|-------------|------------|------------|
|                                       | NCI ↓       | NFO ↓        | NFI ↓       | NCI ↓       | NFO ↓      | NFI ↓      | NCI ↓       | NFO ↓      | NFI ↓      |
| DynaMITE (Swin-T)                     | <b>6.06</b> | <b>12997</b> | <b>2458</b> | <b>2.72</b> | <b>557</b> | <b>329</b> | <b>3.20</b> | <b>541</b> | <b>356</b> |
| - static background queries           | 6.18        | 14436        | 2548        | 2.79        | 639        | 354        | 3.33        | 625        | 393        |
| - Transformer decoder                 | 6.34        | 14504        | 2652        | 2.90        | 657        | 384        | 3.24        | 582        | 371        |
| - temporal positional encoding        | 6.42        | 14729        | 2704        | 2.94        | 682        | 402        | 3.35        | 617        | 388        |
| - spatial positional encoding         | 6.32        | 14506        | 2632        | 2.90        | 671        | 395        | 3.24        | 569        | 370        |
| - spatio-temporal positional encoding | 6.23        | 13552        | 2569        | 2.86        | 608        | 376        | 3.34        | 587        | 379        |

Table II: Ablation on the network design choices, always relative to the top line. NCI: normalised clicks per image, NFO: number of failed objects, NFI: number of failed images. All reported models are trained on COCO+LVIS.

|                                       | GrabCut [6] |             | Berkeley [3] |             | SBD [1]     |             | COCO MVal   |             | DAVIS [5]   |             |
|---------------------------------------|-------------|-------------|--------------|-------------|-------------|-------------|-------------|-------------|-------------|-------------|
|                                       | @85 ↓       | @90 ↓       | @85 ↓        | @90 ↓       | @85 ↓       | @90 ↓       | @85 ↓       | @90 ↓       | @85 ↓       | @90 ↓       |
| DynaMITE (Swin-T)                     | 1.56        | 1.64        | 1.38         | 2.06        | <b>3.83</b> | <b>6.39</b> | <b>2.27</b> | 3.28        | <b>3.75</b> | 5.19        |
| - static background queries           | 1.64        | 1.68        | 1.35         | <b>1.87</b> | 3.92        | 6.51        | 2.31        | <b>3.21</b> | 3.84        | <b>5.15</b> |
| - Transformer decoder                 | 1.64        | 1.76        | <b>1.32</b>  | 2.28        | 4.18        | 6.89        | 2.40        | 3.50        | 3.77        | 5.33        |
| - temporal positional encoding        | <b>1.52</b> | 1.64        | 1.51         | 2.27        | 4.17        | 6.89        | 2.42        | 3.48        | 4.04        | 5.43        |
| - spatial positional encoding         | 1.76        | 1.86        | 1.36         | 2.41        | 4.19        | 6.89        | 2.44        | 3.45        | 3.84        | 5.28        |
| - spatio-temporal positional encoding | 1.56        | <b>1.62</b> | 1.34         | 2.10        | 3.99        | 6.63        | 2.28        | 3.24        | 4.06        | 5.38        |

Table III: Ablation on network design choice, on single-instance segmentation datasets, always relative to the top line.

pool in terms of runtime and GPU memory consumed during inference. Both the runtime and the memory increases as the transformer receives more queries, but the scale-up is quite slow and falls within a reasonable limit for practical usage. As shown in Fig. 1a and Fig. 1b, the runtime increases from 17ms to 34ms as the number of clicks increases from 1 to 200, and the memory used increases from around 800MB to 3.2GB. For a large scale dataset like COCO with an average of 7.3 instances per image, DynaMITE would need about 47 queries (since NCI is 6.4) in the final refinement step and hence the average maximum runtime for a refinement step would be about 23.5ms. The

values reported for both of these experiments in Fig. 1 are an average over the entire GrabCut dataset on an Nvidia 3090 GPU with 24GB of memory.

## V. Refinement Analysis

In this section, we analyze the refinement quality of different variants of DynaMITE for the single-instance setting. Fig. 2 plots change in instance segmentation quality after each refinement iteration on various single-instance datasets. DynaMITE can achieve a high segmentation quality with very few clicks and can further refine the in-

stances very well with additional clicks. Eg. for Grab-Cut, DynaMITe achieves 84% IoU on average with just one click, and then refines them to close to 100% IoU.

## VI. Annotation Tool

For using DynaMITe in practice, we build a click based annotation tool that can perform multi-instance interactive segmentation. Our tool is built using the python based GUI toolkit *Tkinter*, and is based on the RITM [7] annotation tool. The DynaMITe annotation tool supports addition and deletion of instances within an image, and also allows a user to switch back and forth between instances to perform mask refinement. To get a glimpse of our tool, please watch the video on the project page.

It should be noted that this tool is only a prototype and cannot be seen as a proper tool that was optimized for the best possible user experience. Many improvements could be thought of, *e.g.* one could optimize the switching between objects by right-clicking on existing masks and keyboard shortcuts could be included for actions such as creating a new object. We could also easily extend the tool with additional functionalities such as the removal of existing clicks, since this is supported out of the box by DynaMITe. A detailed exploration of this design space is outside of our expertise and the scope of this paper.

## VII. Qualitative Results

In Fig. 3, we show additional multi-instance segmentation results for sequential segmentation process using DynaMITe. Here we follow the *random* strategy, where we first sample a single click per object, after which we iteratively select a random object to refine. In most cases, DynaMITe starts out with a high average IoU after a single click per object and the resulting masks are often arguably better than the corresponding ground truth segmentation, *e.g.* row 3, 5, and 6. Nevertheless, in most cases we can also adjust to arbitrary mistakes present in the ground truth annotations. There are also some interesting failure cases such as the one shown in Fig. 4, where DynaMITe fails to capture the thin ropes of the kite. Although DynaMITe can segment fairly thin structures in practice, the automatic click sampling fails to sample the necessary additional clicks for DynaMITe to segment the ropes in this particular case.

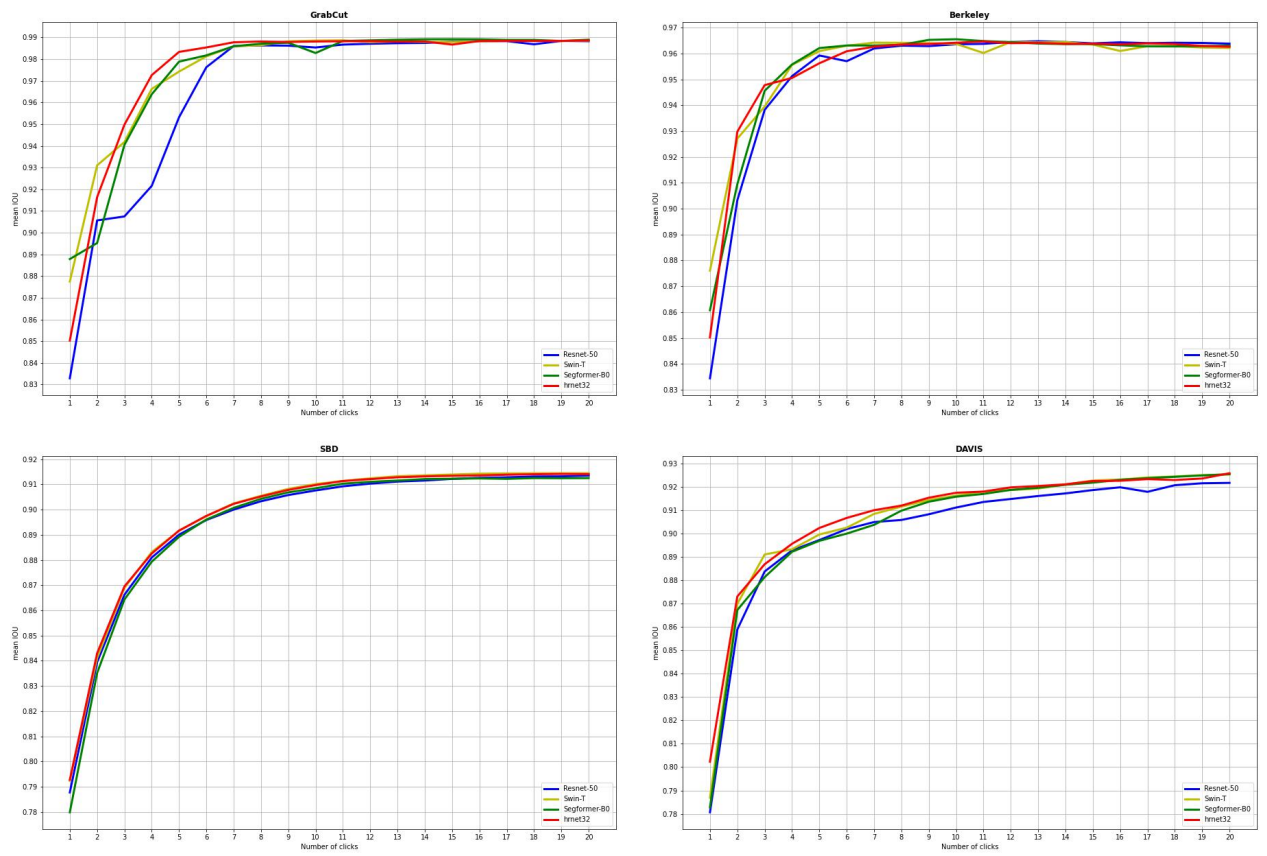

Figure 2: IoU vs. number of clicks for multiple single-instance datasets.



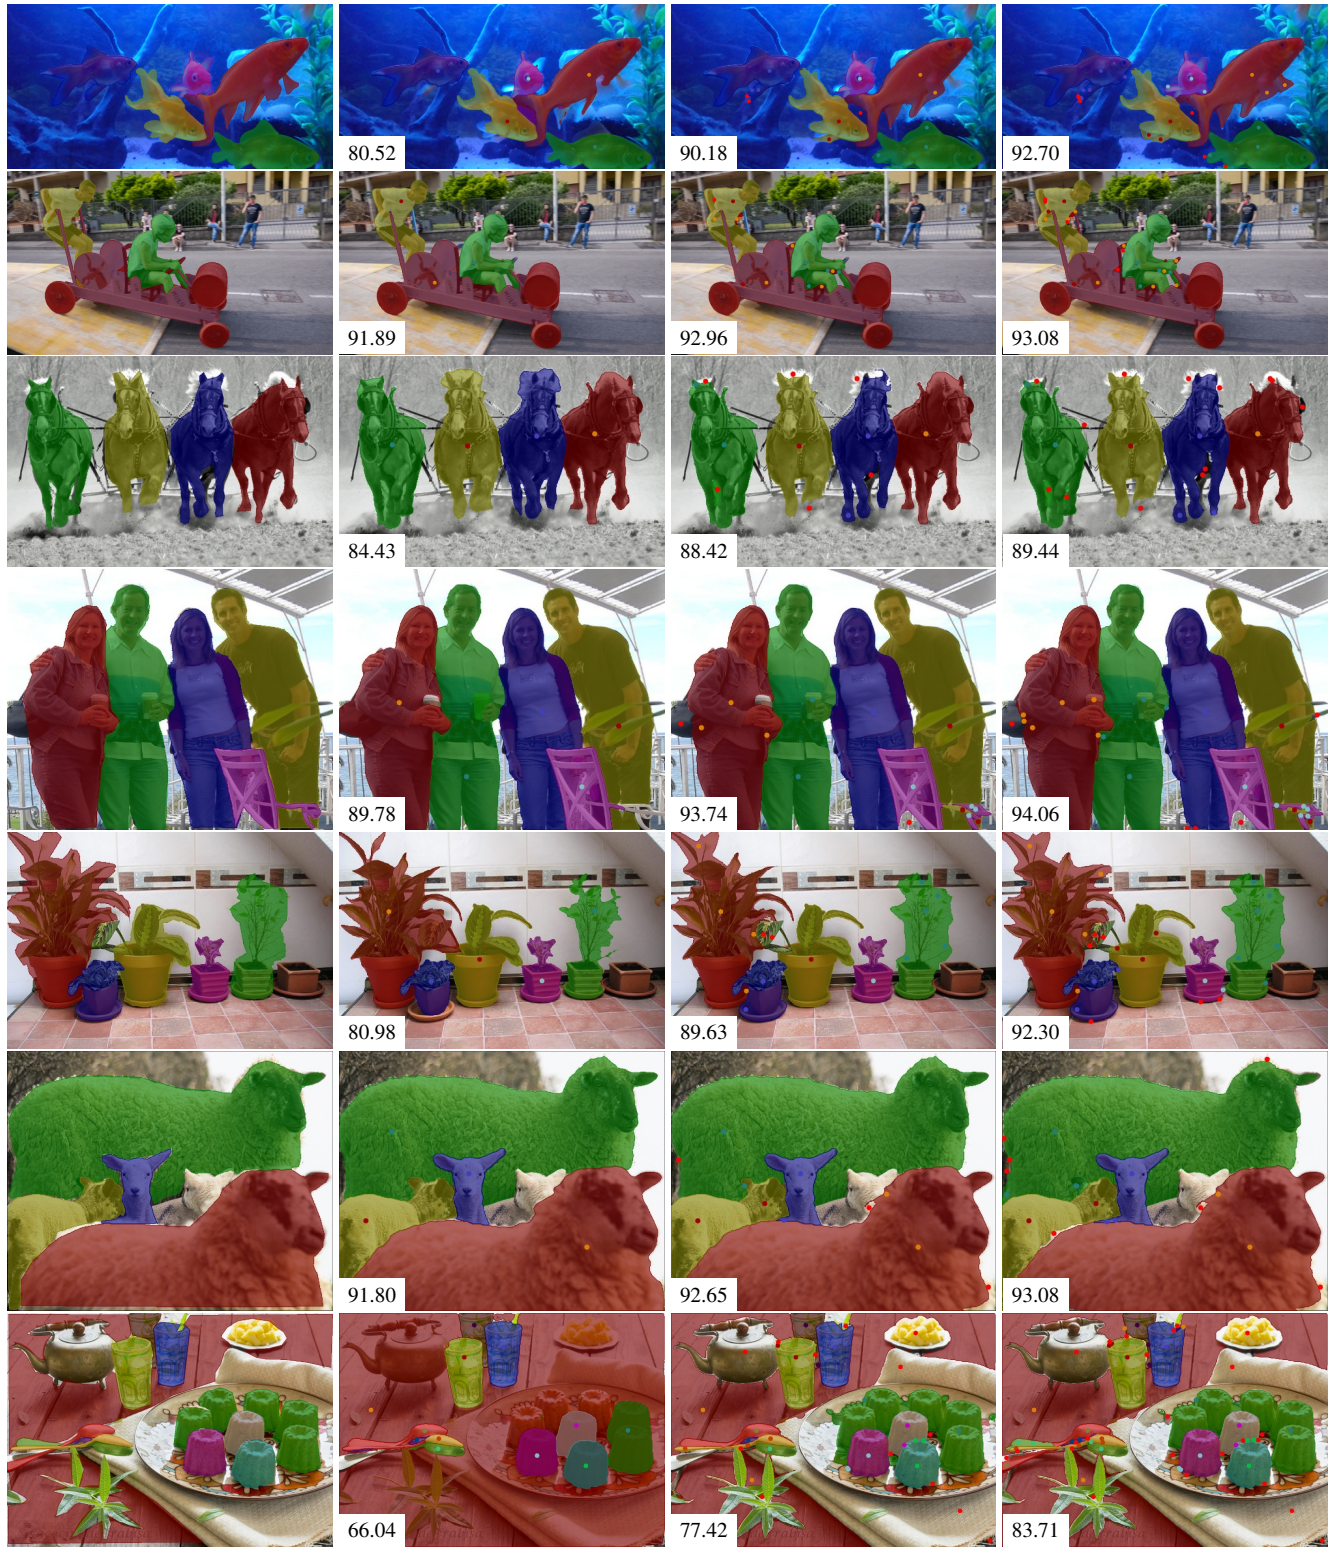

(a) Ground truth

(b)  $\tau = 1$

(c)  $\tau = 3$

(d)  $\tau = 5$

Figure 3: Qualitative examples based on our automatic random click sampling strategy. We show the ground truth and how the segmentation looks after a click budget of  $\tau * |\mathcal{O}|$ . For  $\tau = 1$  we click on each object exactly once. The bottom left corner of each image shows the average IoU.

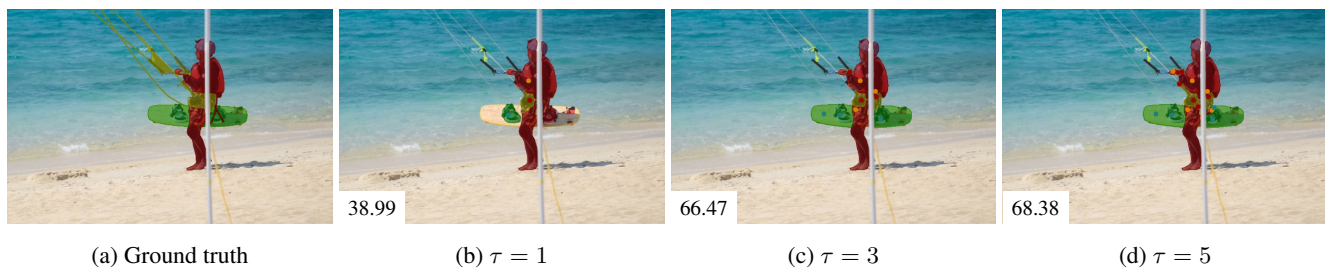

Figure 4: A qualitative example of a negative result. Even though both the board and the ropes of the kite are segmented badly, the board can be recovered with a few additional clicks. After a total of 15 clicks, the refinement is not able to segment the ropes though. Given that the refinement clicks are sampled based on a maximum distance transform, no clicks are sampled for the very thin structure, even though DynaMITe might actually be able to segment such structures.

## References

- [1] Bharath Hariharan, Pablo Arbeláez, Lubomir Bourdev, Subhransu Maji, and Jitendra Malik. Semantic contours from inverse detectors. In *ICCV*, 2011. 3
- [2] Ilya Loshchilov and Frank Hutter. Decoupled weight decay regularization. In *ICLR*, 2019. 1
- [3] Kevin McGuinness and Noel E O’connor. A comparative evaluation of interactive segmentation algorithms. *Pattern Recognition*, 2010. 3
- [4] Fausto Milletari, Nassir Navab, and Seyed-Ahmad Ahmadi. V-net: Fully convolutional neural networks for volumetric medical image segmentation. In *3DV*, 2016. 1
- [5] Federico Perazzi, Jordi Pont-Tuset, Brian McWilliams, Luc Van Gool, Markus Gross, and Alexander Sorkine-Hornung. A benchmark dataset and evaluation methodology for video object segmentation. In *CVPR*, 2016. 3
- [6] Carsten Rother, Vladimir Kolmogorov, and Andrew Blake. ”grabcut”: Interactive foreground extraction using iterated graph cuts. In *SIGGRAPH*, 2004. 3
- [7] Konstantin Sofiiuk, Ilia Petrov, and Anton Konushin. Reviving iterative training with mask guidance for interactive segmentation. *arXiv preprint arXiv:2102.06583*, 2021. 4
